# Supplementary material for: Novel Method to Efficiently Create an mHealth App: Implementation of a Real-Time Electrocardiogram R Peak Detector
Source: PubMed Central journal article supplement (PMC5989064; doi:10.2196/mhealth.8429), 2018-05-22
Supplement: mhealth_v6i5e118_app3.pdf [file mhealth_v6i5e118_app3.pdf]

| <b>Recording number</b> | <b>No. of annotations</b> | <b>Percent of failed detection peaks from total using gqrs algorithm (%)</b> | <b>Percent of failed detection peaks from total using Pan et al. algorithm (%)</b> | <b>Percent of failed detection peaks from total using Behar et al. algorithm (%)</b> | <b>Percent of failed detection peaks from total using Gliner et al. algorithm (%)</b> |
|-------------------------|---------------------------|------------------------------------------------------------------------------|------------------------------------------------------------------------------------|--------------------------------------------------------------------------------------|---------------------------------------------------------------------------------------|
| 100                     | 2369                      | 0.04                                                                         | 0.44                                                                               | 0                                                                                    | 0.00                                                                                  |
| 101                     | 2023                      | 0.21                                                                         | 0.65                                                                               | 0.21                                                                                 | 0.10                                                                                  |
| 102                     | 2220                      | 0.00                                                                         | 0.51                                                                               | 0.05                                                                                 | 0.05                                                                                  |
| 103                     | 2359                      | 0.05                                                                         | 0.43                                                                               | 0                                                                                    | 0.04                                                                                  |
| 104                     | 2398                      | 0.98                                                                         | 0.99                                                                               | 3.2                                                                                  | 1.58                                                                                  |
| 105                     | 3026                      | 1.61                                                                         | 2.23                                                                               | 1.2                                                                                  | 3.60                                                                                  |
| 106                     | 2282                      | 0.89                                                                         | 1.09                                                                               | 4.33                                                                                 | 0.53                                                                                  |
| 107                     | 2186                      | 0.42                                                                         | 0.52                                                                               | 1.1                                                                                  | 0.14                                                                                  |
| 108                     | 1831                      | 4.08                                                                         | 4.94                                                                               | 19                                                                                   | 2.79                                                                                  |
| 109                     | 2570                      | 0.20                                                                         | 0.44                                                                               | 0.6                                                                                  | 0.43                                                                                  |
| 111                     | 2137                      | 0.47                                                                         | 0.57                                                                               | 0.1                                                                                  | 0.42                                                                                  |
| 112                     | 2944                      | 0.04                                                                         | 0.47                                                                               | 0                                                                                    | 0.00                                                                                  |
| 113                     | 1921                      | 0.33                                                                         | 0.45                                                                               | 0                                                                                    | 0.05                                                                                  |
| 114                     | 2121                      | 1.73                                                                         | 0.48                                                                               | 0.1                                                                                  | 0.47                                                                                  |
| 115                     | 2291                      | 0.05                                                                         | 0.41                                                                               | 0                                                                                    | 0.00                                                                                  |
| 116                     | 2742                      | 0.42                                                                         | 0.71                                                                               | 3.94                                                                                 | 0.33                                                                                  |
| 117                     | 1536                      | 0.07                                                                         | 0.46                                                                               | 0                                                                                    | 0.39                                                                                  |
| 118                     | 2417                      | 0.09                                                                         | 0.44                                                                               | 0.09                                                                                 | 0.00                                                                                  |
| 119                     | 2266                      | 0.40                                                                         | 0.56                                                                               | 5.64                                                                                 | 0.10                                                                                  |
| 121                     | 1914                      | 0.27                                                                         | 0.49                                                                               | 0.42                                                                                 | 0.05                                                                                  |
| 122                     | 2853                      | 0.04                                                                         | 0.53                                                                               | 0                                                                                    | 0.04                                                                                  |
| 123                     | 1748                      | 0.13                                                                         | 0.66                                                                               | 0.2                                                                                  | 1.58                                                                                  |
| 124                     | 1788                      | 0.12                                                                         | 0.37                                                                               | 0                                                                                    | 3.60                                                                                  |
| 200                     | 2853                      | 0.38                                                                         | 0.66                                                                               | 1.15                                                                                 | 0.53                                                                                  |
| 201                     | 2424                      | 1.87                                                                         | 2.62                                                                               | 8.88                                                                                 | 0.14                                                                                  |
| 202                     | 2828                      | 0.28                                                                         | 0.47                                                                               | 0.51                                                                                 | 2.79                                                                                  |
| 203                     | 3203                      | 3.91                                                                         | 3.77                                                                               | 7.68                                                                                 | 0.43                                                                                  |
| 205                     | 3193                      | 0.41                                                                         | 0.83                                                                               | 0.5                                                                                  | 0.42                                                                                  |
| 207                     | 2205                      | 12.13                                                                        | 10.80                                                                              | 18.64                                                                                | 0.00                                                                                  |
| 208                     | 3479                      | 1.43                                                                         | 1.88                                                                               | 26.5                                                                                 | 0.05                                                                                  |
| 209                     | 3167                      | 0.10                                                                         | 0.50                                                                               | 0.07                                                                                 | 0.47                                                                                  |
| 210                     | 2968                      | 1.88                                                                         | 1.76                                                                               | 1.55                                                                                 | 0.00                                                                                  |
| 212                     | 3048                      | 0.11                                                                         | 0.40                                                                               | 0                                                                                    | 0.33                                                                                  |
| 213                     | 3326                      | 0.18                                                                         | 0.65                                                                               | 1.7                                                                                  | 0.39                                                                                  |
| 214                     | 2853                      | 0.49                                                                         | 0.67                                                                               | 0.8                                                                                  | 0.04                                                                                  |
| 215                     | 3459                      | 0.18                                                                         | 0.48                                                                               | 0.356                                                                                | 0.04                                                                                  |

|                |             |             |             |             |             |
|----------------|-------------|-------------|-------------|-------------|-------------|
| 217            | 2300        | 0.36        | 0.86        | 0.53        | 0.05        |
| 219            | 2574        | 2.92        | 0.61        | 7.98        | 0.04        |
| 220            | 2172        | 0.10        | 0.49        | 0           | 0.00        |
| 221            | 3027        | 0.25        | 0.62        | 14.36       | 0.00        |
| 222            | 3051        | 1.01        | 1.37        | 0.4         | 0.32        |
| 223            | 3046        | 1.19        | 1.54        | 6.33        | 0.00        |
| 228            | 2454        | 1.02        | 1.46        | 5.95        | 0.10        |
| 230            | 2554        | 0.09        | 0.58        | 0.04        | 0.05        |
| 231            | 2419        | 0.13        | 0.64        | 0.19        | 0.04        |
| 232            | 2430        | 0.67        | 0.62        | 56.66       | 1.58        |
| 233            | 3358        | 0.29        | 0.75        | 0.55        | 3.60        |
| 234            | 2779        | 0.25        | 0.62        | 0.18        | 0.53        |
| <b>Average</b> | <b>2565</b> | <b>0.92</b> | <b>1.13</b> | <b>4.20</b> | <b>0.84</b> |
