# Supplementary material for: Novel Method to Efficiently Create an mHealth App: Implementation of a Real-Time Electrocardiogram R Peak Detector
Source: PubMed Central journal article supplement (PMC5989064; doi:10.2196/mhealth.8429), 2018-05-22
Supplement: mhealth_v6i5e118_app4.pdf [file mhealth_v6i5e118_app4.pdf]

|            | gqrs<br>algorithm |                   |              | Pan et al.<br>algorithm |                   |              | Current<br>algorithm |                   |              |
|------------|-------------------|-------------------|--------------|-------------------------|-------------------|--------------|----------------------|-------------------|--------------|
|            | AF<br>(%)         | Non-<br>AF<br>(%) | Total<br>(%) | AF<br>(%)               | Non-<br>AF<br>(%) | Total<br>(%) | AF<br>(%)            | Non-<br>AF<br>(%) | Total<br>(%) |
| <b>FND</b> | 0.5               | 0.05              | 0.25         | 0.8                     | 0.5               | 0.6          | 0.5                  | 0.05              | 0.3          |
| <b>FPD</b> | 0.5               | 0.1               | 0.3          | 0.3                     | 0.03              | 0.2          | 0.7                  | 0.09              | 0.4          |
| <b>Se</b>  | 99.5              | 99.9              | 99.7         | 99.2                    | 99.97             | 99.6         | 99.5                 | 99.9              | 99.7         |
| <b>PPV</b> | 99.5              | 99.9              | 99.7         | 99.7                    | 99.9              | 99.8         | 99.3                 | 99.9              | 99.6         |
