# Supplementary material for: Novel Method to Efficiently Create an mHealth App: Implementation of a Real-Time Electrocardiogram R Peak Detector
Source: PubMed Central journal article supplement (PMC5989064; doi:10.2196/mhealth.8429), 2018-05-22
Supplement: mhealth_v6i5e118_app5.pdf [file mhealth_v6i5e118_app5.pdf]

|            | gqrs<br>algorithm |                   |              | Pan et al.<br>algorithm |                   |              | Current<br>algorithm |                   |              |
|------------|-------------------|-------------------|--------------|-------------------------|-------------------|--------------|----------------------|-------------------|--------------|
|            | AF<br>(%)         | Non-<br>AF<br>(%) | Total<br>(%) | AF<br>(%)               | Non-<br>AF<br>(%) | Total<br>(%) | AF<br>(%)            | Non-<br>AF<br>(%) | Total<br>(%) |
| <b>FND</b> | 0.4               | 0.2               | 0.3          | 0.6                     | 0.5               | 0.6          | 0.2                  | 0.15              | 0.17         |
| <b>FPD</b> | 1.3               | 0.6               | 0.96         | 1.2                     | 0.6               | 0.9          | 0.9                  | 0.6               | 0.8          |
| <b>Se</b>  | 99.6              | 99.8              | 99.7         | 99.3                    | 99.5              | 99.4         | 99.8                 | 99.9              | 99.8         |
| <b>PPV</b> | 98.7              | 99.4              | 99.0         | 98.8                    | 99.4              | 99.1         | 99.1                 | 99.4              | 99.2         |
