# Supplementary material for: Novel Method to Efficiently Create an mHealth App: Implementation of a Real-Time Electrocardiogram R Peak Detector
Source: PubMed Central journal article supplement (PMC5989064; doi:10.2196/mhealth.8429), 2018-05-22
Supplement: mhealth_v6i5e118_app6.pdf [file mhealth_v6i5e118_app6.pdf]

|                                | <b>gqrs<br/>algorithm</b> |                            |                      | <b>Pan et al.<br/>algorithm</b> |                            |                      | <b>Current<br/>algorithm</b> |                            |                      |
|--------------------------------|---------------------------|----------------------------|----------------------|---------------------------------|----------------------------|----------------------|------------------------------|----------------------------|----------------------|
|                                | <b>AF<br/>(%)</b>         | <b>Non-<br/>AF<br/>(%)</b> | <b>Total<br/>(%)</b> | <b>AF<br/>(%)</b>               | <b>Non-<br/>AF<br/>(%)</b> | <b>Total<br/>(%)</b> | <b>AF<br/>(%)</b>            | <b>Non-<br/>AF<br/>(%)</b> | <b>Total<br/>(%)</b> |
| <b>False<br/>negative</b>      | 0.4                       | 0.2                        | 0.3                  | 0.7                             | 0.5                        | 0.6                  | 0.3                          | 0.1                        | 0.2                  |
| <b>False<br/>positive</b>      | 0.9                       | 0.5                        | 0.7                  | 0.9                             | 0.5                        | 0.7                  | 0.97                         | 0.5                        | 0.7                  |
| <b>Total<br/>False</b>         | 1.4                       | 0.7                        | 1.0                  | 1.6                             | 0.95                       | 1.3                  | 1.3                          | 0.6                        | 0.97                 |
| <b>Sensitivit<br/>y</b>        | 99.6                      | 99.8                       | 99.7                 | 99.3                            | 99.5                       | 99.4                 | 99.7                         | 99.9                       | 99.8                 |
| <b>Positive<br/>prediction</b> | 99.1                      | 99.5                       | 99.3                 | 99.1                            | 99.5                       | 99.3                 | 99.0                         | 99.5                       | 99.2                 |
