# Supplementary material for: Novel Method to Efficiently Create an mHealth App: Implementation of a Real-Time Electrocardiogram R Peak Detector
Source: PubMed Central journal article supplement (PMC5989064; doi:10.2196/mhealth.8429), 2018-05-22
Supplement: mhealth_v6i5e118_app7.pdf [file mhealth_v6i5e118_app7.pdf]

|                                | <b>gqrs<br/>algorithm</b> |                            |                      | <b>Pan et al.<br/>algorithm</b> |                            |                      | <b>Current<br/>algorithm</b> |                            |                      |
|--------------------------------|---------------------------|----------------------------|----------------------|---------------------------------|----------------------------|----------------------|------------------------------|----------------------------|----------------------|
|                                | <b>AF<br/>(%)</b>         | <b>Non-<br/>AF<br/>(%)</b> | <b>Total<br/>(%)</b> | <b>AF<br/>(%)</b>               | <b>Non-<br/>AF<br/>(%)</b> | <b>Total<br/>(%)</b> | <b>AF<br/>(%)</b>            | <b>Non-<br/>AF<br/>(%)</b> | <b>Total<br/>(%)</b> |
| <b>False<br/>negative</b>      | 0.3                       | 0.05                       | 0.2                  | 0.8                             | 0.4                        | 0.6                  | 0.6                          | 0.06                       | 0.3                  |
| <b>False<br/>positive</b>      | 0.6                       | 0.3                        | 0.4                  | 0.4                             | 0.1                        | 0.3                  | 0.5                          | 0.1                        | 0.3                  |
| <b>Total<br/>False</b>         | 0.9                       | 0.3                        | 0.6                  | 1.2                             | 0.6                        | 0.9                  | 1.1                          | 0.15                       | 0.6                  |
| <b>Sensitivit<br/>y</b>        | 99.6                      | 99.9                       | 99.8                 | 99.2                            | 99.6                       | 99.4                 | 99.4                         | 99.9                       | 99.7                 |
| <b>Positive<br/>prediction</b> | 99.4                      | 99.7                       | 99.6                 | 99.6                            | 99.9                       | 99.7                 | 99.5                         | 99.9                       | 99.7                 |
